# Supplementary material for: Dexmedetomidine Protects Cerebellar Neurons against Hyperoxia-Induced Oxidative Stress and Apoptosis in the Juvenile Rat
Source: MDPI journal article supplement (doi:10.3390/ijms24097804), 2023-04-25
Supplement: s1 [file s1]

**Table S-2** Quantification of oxidative stress

|                        | NO       | NOD      | HY       | HYD      |
|------------------------|----------|----------|----------|----------|
| <b>hyperoxia</b>       | –        | –        | +        | +        |
| <b>dexmedetomidine</b> | –        | +        | –        | +        |
| <b>P7</b>              |          |          |          |          |
| <b>TBARS</b>           | 100±9.0  | 60±8.4   | 194±9.5  | 88±14.0  |
| <i>GCLC</i>            | 100±8.4  | 100±4.3  | 147±13.8 | 117±4.6  |
| <i>Nrf2</i>            | 100±7.9  | 106±6.9  | 152±10.8 | 83±11.0  |
| <i>SOD1</i>            | 100±8.6  | 84±9.4   | 124±8.5  | 79±6.2   |
| <i>SOD2</i>            | 100±6.3  | 83±6.6   | 132±9.9  | 98±2.4   |
| <i>SOD3</i>            | 100±4.4  | 62±6.6   | 150±6.8  | 171±7.2  |
| <b>P9</b>              |          |          |          |          |
| <b>TBARS</b>           | 100±10.0 | 61±13.1  | 135±4.6  | 49±8.3   |
| <i>GCLC</i>            | 100±8.6  | 106±6.3  | 106±4.6  | 95±9.0   |
| <i>Nrf2</i>            | 100±3.9  | 96±19.2  | 137±9.8  | 75±10.2  |
| <i>SOD1</i>            | 100±9.7  | 112±9.1  | 106±6.1  | 77±6.7   |
| <i>SOD2</i>            | 100±7.7  | 136±7.7  | 146±9.4  | 126±15.5 |
| <i>SOD3</i>            | 100±5.9  | 75±2.8   | 56±8.6   | 65±8.6   |
| <b>P11</b>             |          |          |          |          |
| <b>TBARS</b>           | 100±10.7 | 103±15.7 | 76±10.2  | 118±14.4 |
| <i>GCLC</i>            | 100±11.8 | 209±26.1 | 656±90.8 | 385±20.6 |
| <i>Nrf2</i>            | 100±8.6  | 114±5.9  | 115±1.8  | 80±5.6   |
| <i>SOD1</i>            | 100±7.6  | 87±7.0   | 83±2.1   | 62±2.5   |
| <i>SOD2</i>            | 100±4.2  | 106±4.9  | 132±5.6  | 105±2.7  |
| <i>SOD3</i>            | 100±8.5  | 103±5.1  | 100±3.5  | 74±8.6   |
| <b>P14</b>             |          |          |          |          |
| <b>TBARS</b>           | 100±10.2 | 111±15.9 | 104±5.4  | 93±13.0  |
| <i>GCLC</i>            | 100±6.0  | 108±9.4  | 82±5.1   | 72±6.2   |
| <i>Nrf2</i>            | 100±8.2  | 81±7.0   | 73±3.2   | 63±7.8   |
| <i>SOD1</i>            | 100±5.5  | 87±3.3   | 78±5.2   | 71±4.1   |
| <i>SOD2</i>            | 100±5.3  | 116±5.2  | 97±4.7   | 93±5.5   |
| <i>SOD3</i>            | 100±3.8  | 118±4.7  | 116±7.3  | 92±9.1   |

Data are normalized to the level of rat pups exposed to normoxia at each time point (control 100 %). n = 6/group (ANOVA, Bonferroni's *post hoc* test).
