# Supplementary material for: Dexmedetomidine Protects Cerebellar Neurons against Hyperoxia-Induced Oxidative Stress and Apoptosis in the Juvenile Rat
Source: MDPI journal article supplement (doi:10.3390/ijms24097804), 2023-04-25
Supplement: s1 [file s1]

**Table S-3** Quantification of inflammation

|                               | NO             | NOD           | HY             | HYD            |
|-------------------------------|----------------|---------------|----------------|----------------|
| <b>hyperoxia</b>              | -              | -             | +              | +              |
| <b>dexmedetomidine</b>        | -              | +             | -              | +              |
| <b>P7</b>                     |                |               |                |                |
| <b>TNF<math>\alpha</math></b> | 100 $\pm$ 9.2  | 107 $\pm$ 6.4 | 137 $\pm$ 7.4  | 90 $\pm$ 10.6  |
| <i>TNF<math>\alpha</math></i> | 100 $\pm$ 11.9 | 69 $\pm$ 2.7  | 192 $\pm$ 23.6 | 83 $\pm$ 7.5   |
| <i>IL1<math>\beta</math></i>  | 100 $\pm$ 6.0  | 51 $\pm$ 9.3  | 62 $\pm$ 6.4   | 72 $\pm$ 5.0   |
| <b>P9</b>                     |                |               |                |                |
| <b>TNF<math>\alpha</math></b> | 100 $\pm$ 9.4  | 91 $\pm$ 11.7 | 99 $\pm$ 8.0   | 90 $\pm$ 8.0   |
| <i>TNF<math>\alpha</math></i> | 100 $\pm$ 6.3  | 107 $\pm$ 9.4 | 130 $\pm$ 6.6  | 82 $\pm$ 6.5   |
| <i>IL1<math>\beta</math></i>  | 100 $\pm$ 6.9  | 106 $\pm$ 7.8 | 79 $\pm$ 11.5  | 55 $\pm$ 6.8   |
| <b>P11</b>                    |                |               |                |                |
| <b>TNF<math>\alpha</math></b> | 100 $\pm$ 12.8 | 110 $\pm$ 9.6 | 107 $\pm$ 10.3 | 190 $\pm$ 15.5 |
| <i>TNF<math>\alpha</math></i> | 100 $\pm$ 7.5  | 88 $\pm$ 7.6  | 55 $\pm$ 4.3   | 158 $\pm$ 5.8  |
| <i>IL1<math>\beta</math></i>  | 100 $\pm$ 7.9  | 95 $\pm$ 8.2  | 83 $\pm$ 9.8   | 74 $\pm$ 8.3   |
| <b>P14</b>                    |                |               |                |                |
| <b>TNF<math>\alpha</math></b> | 100 $\pm$ 9.5  | 114 $\pm$ 6.9 | 114 $\pm$ 9.7  | 111 $\pm$ 10.2 |
| <i>TNF<math>\alpha</math></i> | 100 $\pm$ 6.1  | 91 $\pm$ 5.5  | 86 $\pm$ 0.7   | 90 $\pm$ 7.9   |
| <i>IL1<math>\beta</math></i>  | 100 $\pm$ 4.9  | 73 $\pm$ 4.5  | 60 $\pm$ 9.1   | 83 $\pm$ 8.8   |

Data are normalized to the level of rat pups exposed to normoxia at each time point (control 100 %). n = 6/group (ANOVA, Bonferroni's *post hoc* test).
