# Supplementary material for: Dexmedetomidine Protects Cerebellar Neurons against Hyperoxia-Induced Oxidative Stress and Apoptosis in the Juvenile Rat
Source: MDPI journal article supplement (doi:10.3390/ijms24097804), 2023-04-25
Supplement: s1 [file s1]

**Table S-1** Quantitation of cell death

|                        | NO       | NOD      | HY       | HYD     |
|------------------------|----------|----------|----------|---------|
| <b>hyperoxia</b>       | –        | –        | +        | +       |
| <b>dexmedetomidine</b> | –        | +        | –        | +       |
| <b>P7</b>              |          |          |          |         |
| <b>Casp3+ ratio</b>    | 100±5.1  | 85±6.4   | 132±3.5  | 53±4.5  |
| <i>Casp3</i>           | 100±7.9  | 105±5.2  | 142±9.6  | 148±8.3 |
| <i>AIF</i>             | 100±7.7  | 101±6.7  | 146±8.1  | 99±5.8  |
| <b>P9</b>              |          |          |          |         |
| <b>Casp3+ ratio</b>    | 100±11.6 | 88±10.2  | 154±17.5 | 84±12.0 |
| <i>Casp3</i>           | 100±6.2  | 86±5.6   | 144±4.8  | 88±7.6  |
| <i>AIF</i>             | 100±9.9  | 110±5.7  | 122±9.0  | 101±8.8 |
| <b>P11</b>             |          |          |          |         |
| <b>Casp3+ ratio</b>    | 100±5.7  | 162±13.0 | 103±10.4 | 112±7.4 |
| <i>Casp3</i>           | 100±7.2  | 147±5.7  | 164±8.0  | 109±3.0 |
| <i>AIF</i>             | 100±6.8  | 110±5.0  | 119±6.0  | 90±6.5  |
| <b>P14</b>             |          |          |          |         |
| <b>Casp3+ ratio</b>    | 100±9.9  | 91±5.5   | 116±5.0  | 108±3.2 |
| <i>Casp3</i>           | 100±7.4  | 99±7.2   | 102±5.4  | 72±1.1  |
| <i>AIF</i>             | 100±8.1  | 105±6.4  | 92±3.2   | 74±6.8  |

Data are normalized to the level of rat pups exposed to normoxia at each time point (control 100 %). n = 6/group (ANOVA, Bonferroni's *post hoc* test).
